# Supplementary material
Source: publisher figshare collection journal article supplement (https://acs.figshare.com/ndownloader/files/8654878)
Supplement: Supplementary file 1 [file 8654878]

## **Sulfur-Driven Iron Reduction Coupled to Anaerobic Ammonium Oxidation**

Peng Bao<sup>1,2,\*</sup> and Guo-Xiang Li<sup>1,2,3</sup>

<sup>1</sup> Key Lab of Urban Environment and Health, Institute of Urban Environment, Chinese Academy of Sciences, Xiamen, 361021, P. R. China

<sup>2</sup> Key Lab of Urban Environmental Processes and Pollution Control, Ningbo Urban Environment Observation and Research Station, Chinese Academy of Sciences, Ningbo, 315800, China

<sup>3</sup> University of Chinese Academy of Sciences, Beijing, China

Address correspondence to Professor Peng Bao, Institute of Urban Environment, Chinese Academy of Sciences, Xiamen, 361021, P. R. China. E-mail: [pbao@iue.ac.cn](mailto:pbao@iue.ac.cn)

Phone: +86-574-86085998; Fax: +86-574-86784810

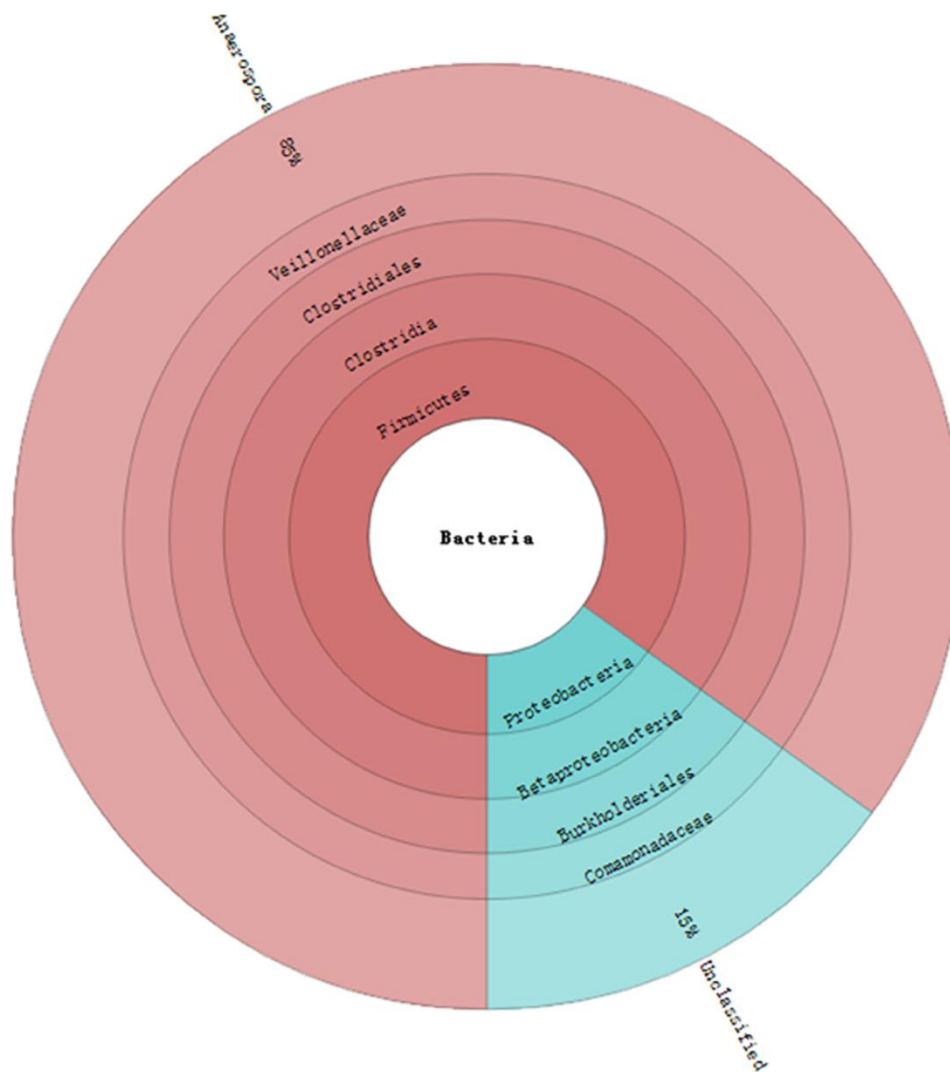

Figure S1. Species annotation of HJ-4 consortium under anaerobic conditions. The mean relative abundances of 16S rRNA gene sequences, classified at the division level.

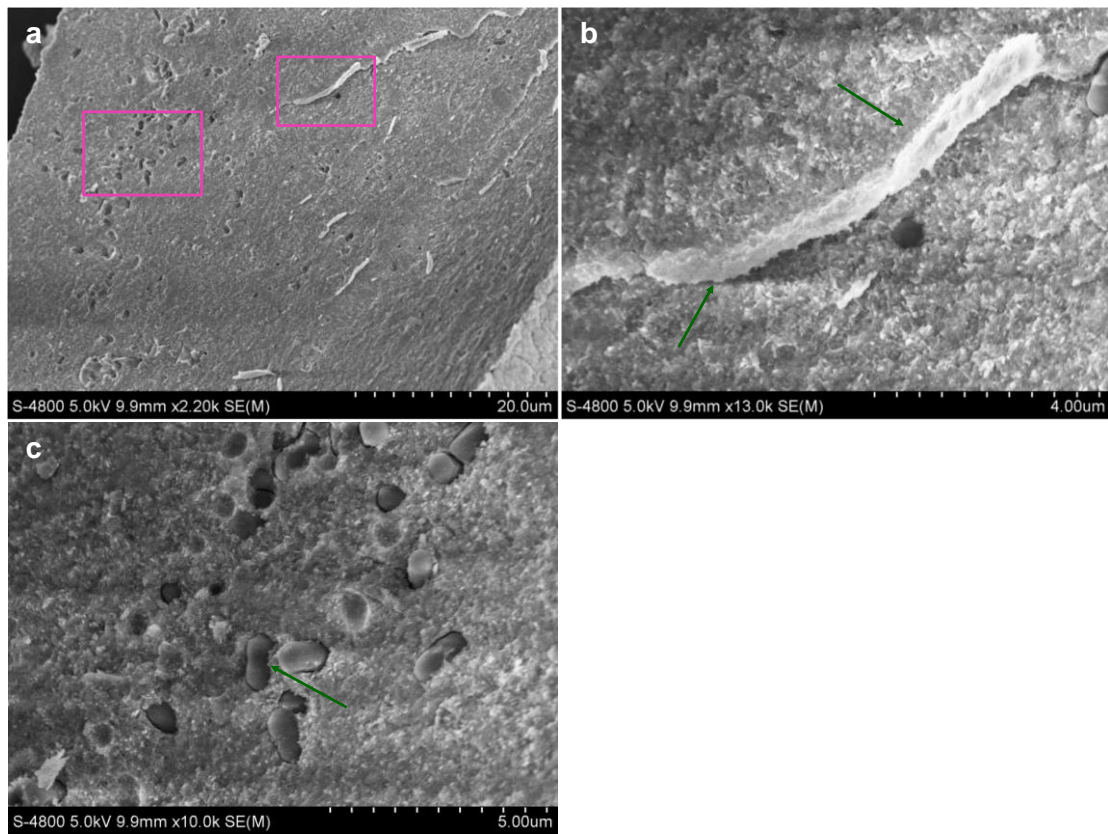

Figure S2. Electron microscope image illustrating cell morphology and size of *Anaerospora hongkongensis* (b) and *Comamonadaceae* (c). Morphology of iron mineralogy on *Anaerospora hongkongensis* surface (b).

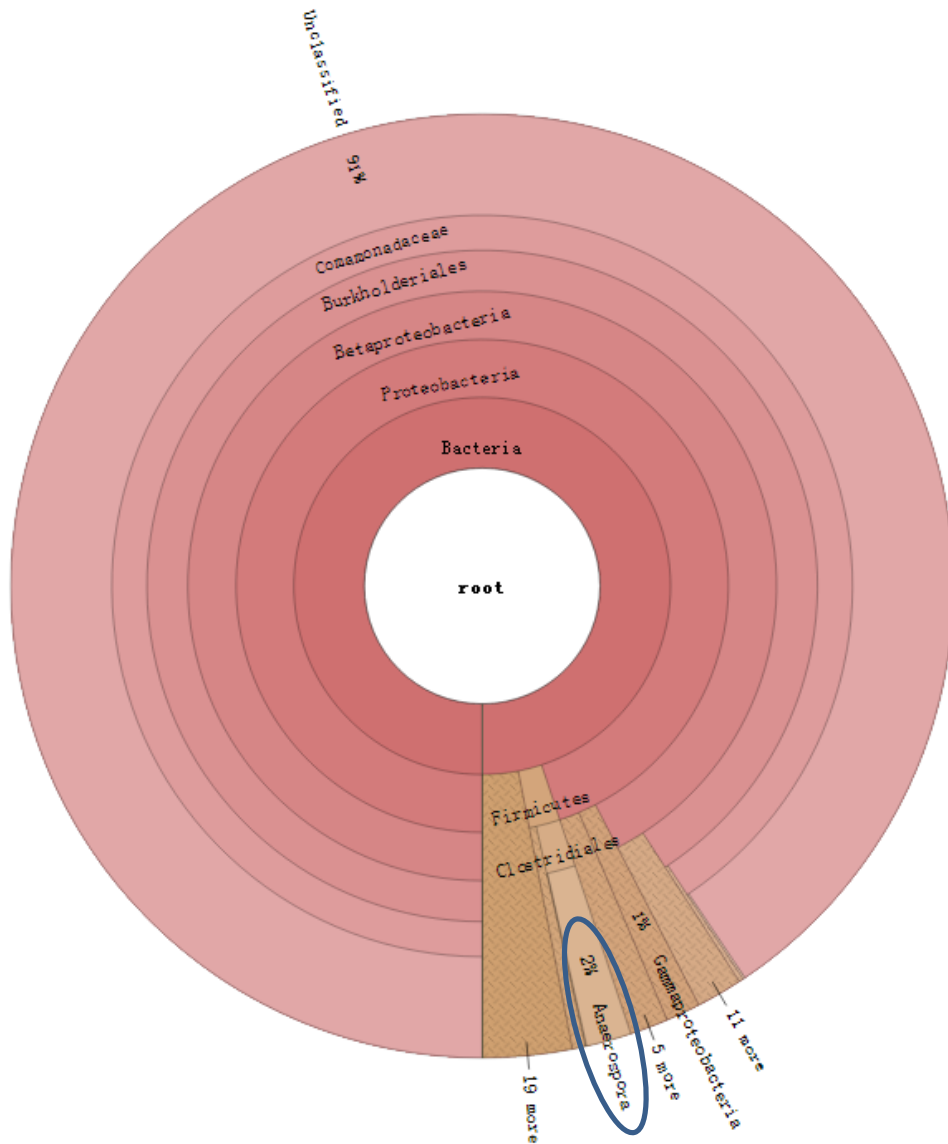

Figure S3. Species annotation of HJ-4 consortium under aerobic conditions. The mean relative abundances of 16S rRNA gene sequences, classified at the division level.

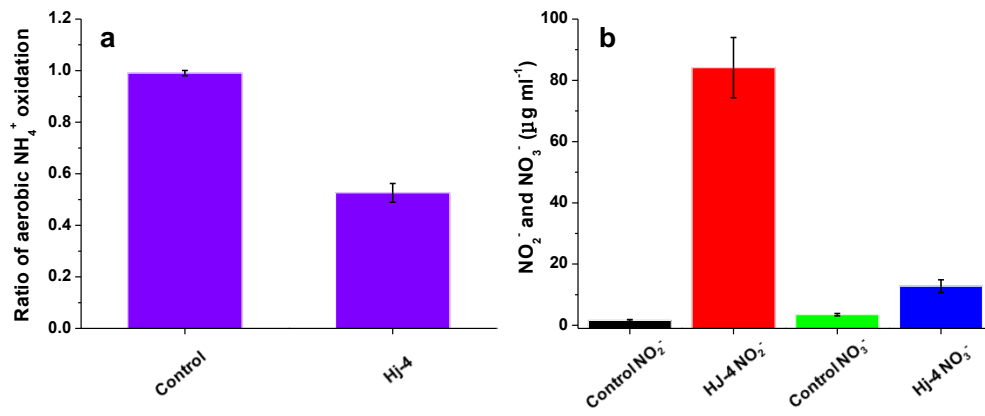

Figure S4. Nitrification of HJ-4 consortium under aerobic condition. Oxidation of ammonium (a), generation of nitrite and nitrate (b).

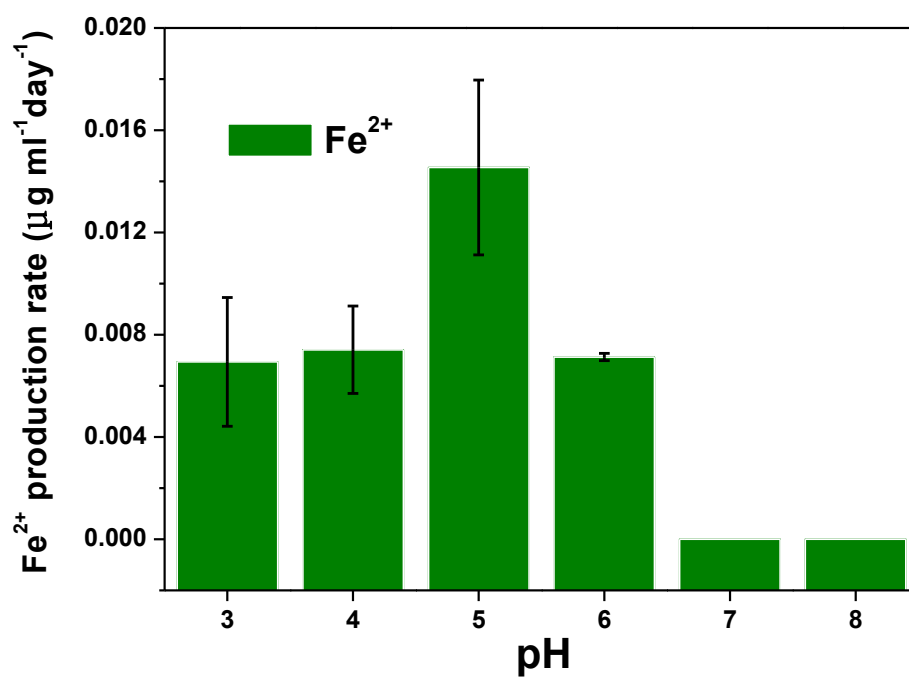

Figure S5. Ferrous production rate at pH 3, 4, 5, 6, 7, and 8 by the HJ-4 consortium.

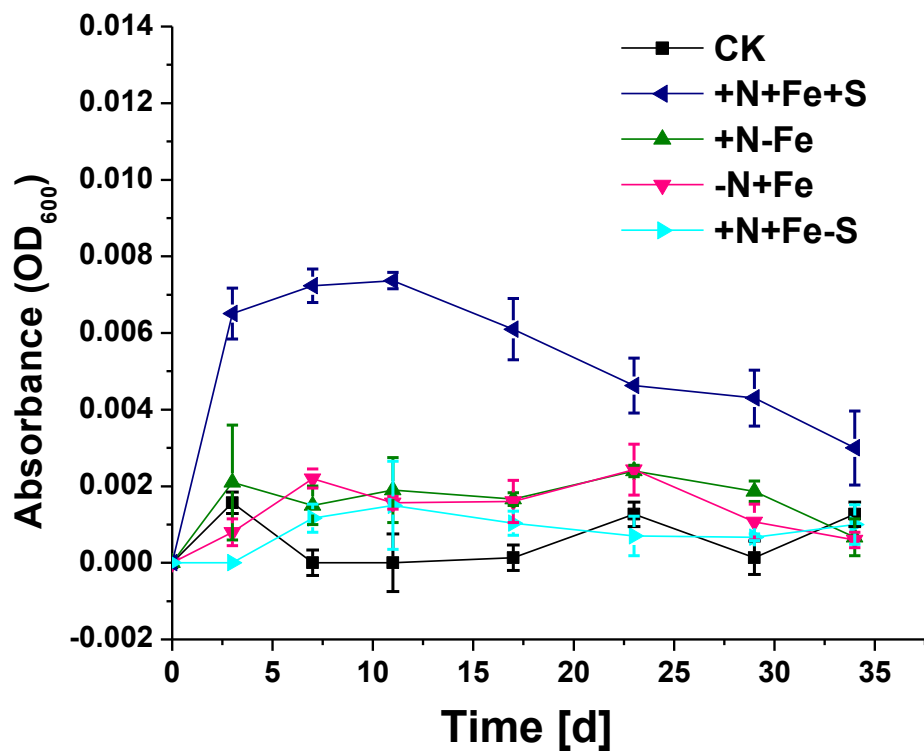

Figure S6. Growth of HJ-4 consortium under the condition of that with/without ammonium, ferrihydrite, and sulfide, respectively.

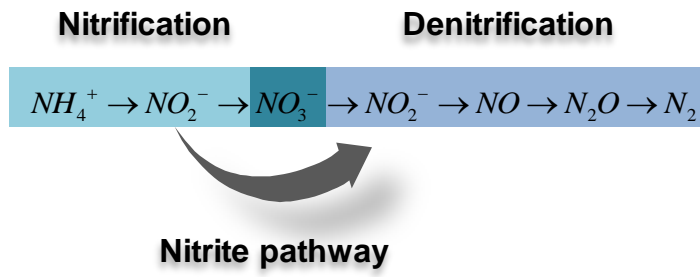

Figure S7. Biological nitrification–denitrification *via* nitrite pathway in the HJ-4 consortium.
